# Supplementary figures and images for: High-resolution imaging of skin deformation shows that afferents from human fingertips signal slip onset
Source: eLife journal article supplement (doi:10.7554/elife.64679), 2021-04-22

**U104-02 FA-I**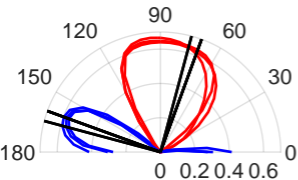**U105-03 FA-I**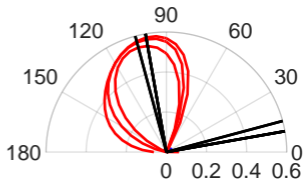**U107-05 FA-I**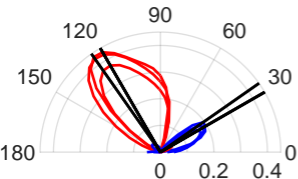**U109-03 FA-I**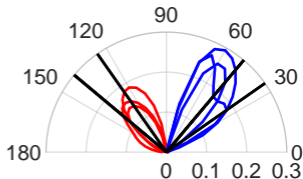**U110-03 FA-I**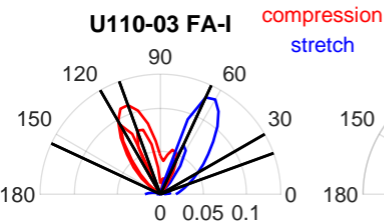**U115-04 FA-I**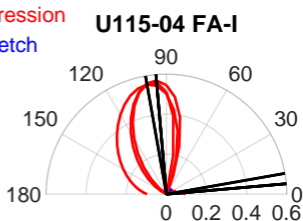

Supplement: supp [file elife-64679-supp-v1.zip]

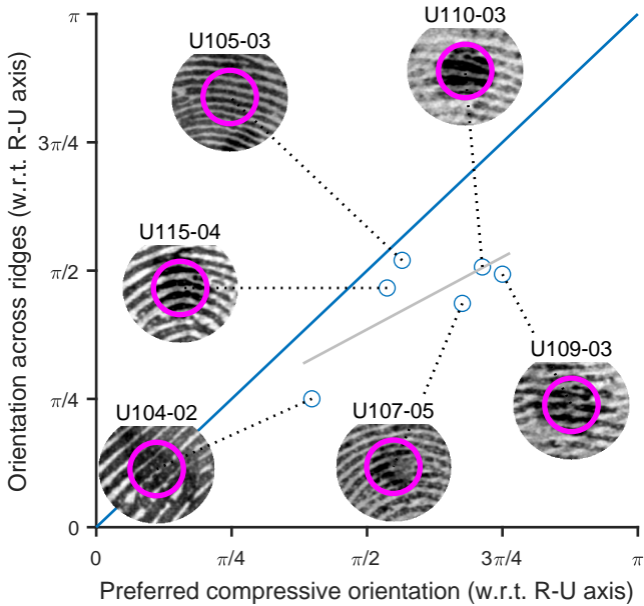

Supplement: supp [file elife-64679-supp-v1.zip]

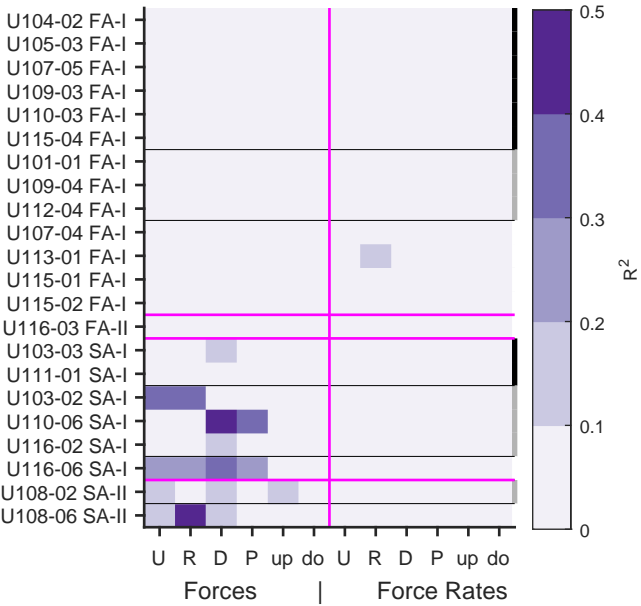

Supplement: supp [file elife-64679-supp-v1.zip]

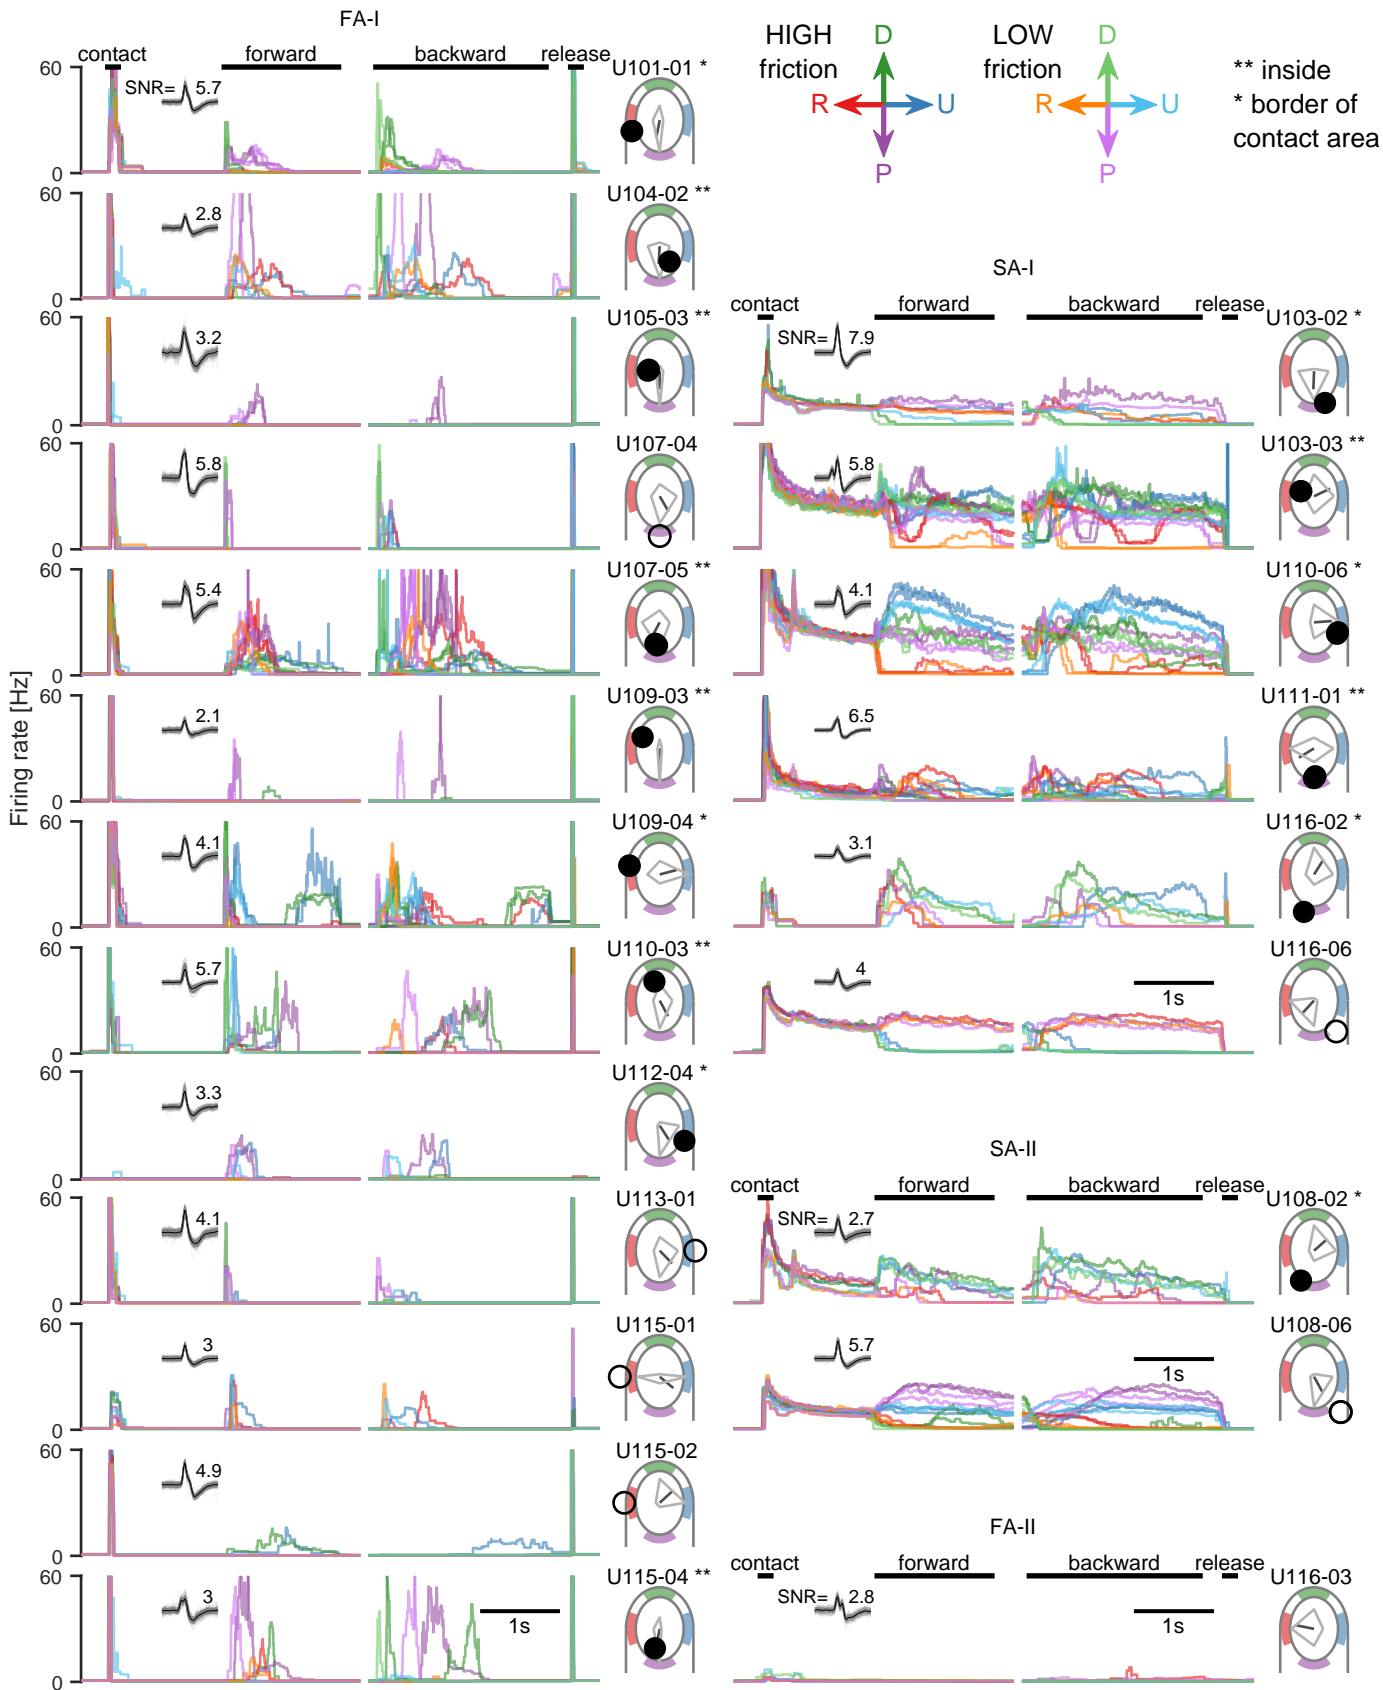

Supplement: supp [file elife-64679-supp-v1.zip]

# FA-I inside

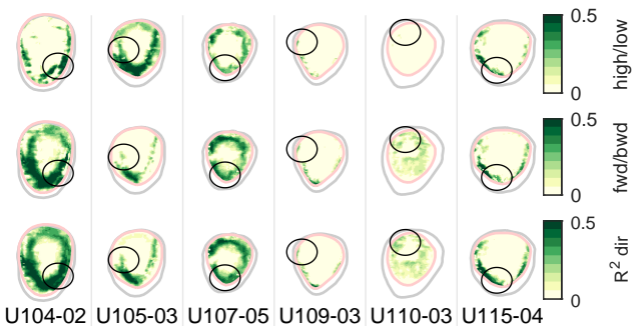

## FA-I border

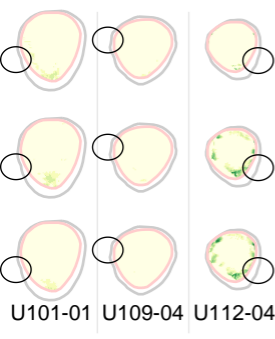

## FA-I outside

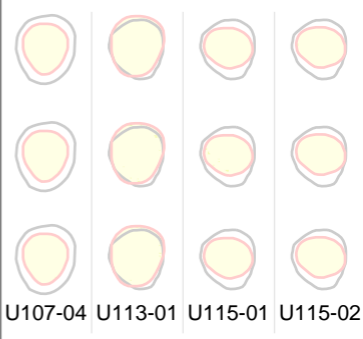

## SA-I inside

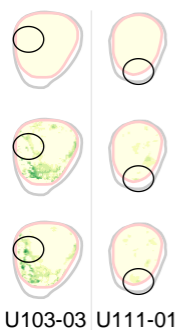

## SA-I border

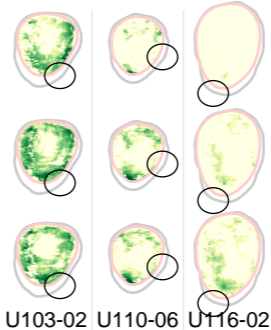

## SA-I out

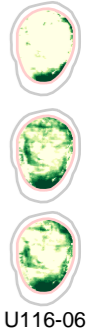

Supplement: supp [file elife-64679-supp-v1.zip]

FA-I inside

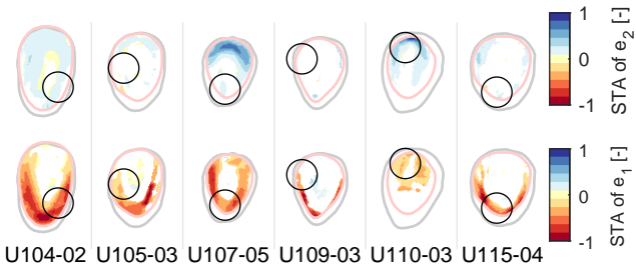

FA-I border

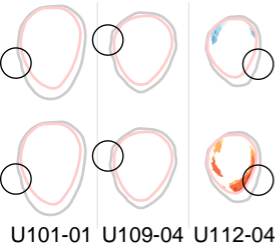

FA-I outside

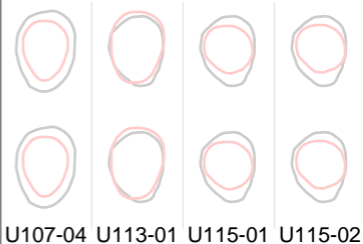

SA-I inside

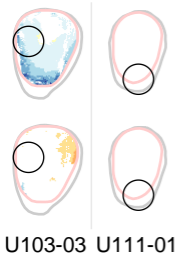

SA-I border

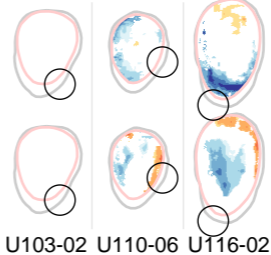

SA-I out

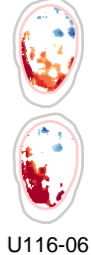

Supplement: supp [file elife-64679-supp-v1.zip]
